# Supplementary material
Source: Frontiers journal article supplement (https://www.frontiersin.org/articles/406115)
Supplement: Data_Sheet_1.PDF [file Data_Sheet_1.PDF]

**NIGERIAN INSTITUTE OF LEATHER & SCIENCE TECHNOLOGY (NILEST)  
DIRECTORATE OF RESEARCH & DEVELOPMENT  
ZARIA, NIGERIA**

*Date:* \_\_\_\_\_

Dear Respondent,

We are a research unit within the institute, currently researching the *Attitudes, Perceptions and Barriers towards Research among NILEST Staff* (working topic). To this end, we respectfully request your assistance via this questionnaire to conduct a survey on this matter. Your specific identity will not be required, and other identifying details which may be provided will be treated with utmost confidentiality as your sincere response to these questions will be appreciated.

Yours Faithfully,

.....  
Secretary,  
Research Team

## RESPONDENT DETAILS

Directorate.....

Department .....

## DEMOGRAPHIC CHARACTERISTICS

1. **Gender:** Male ☐ Female ☐
2. **Years of Service:** 1 – 10 ☐, 11 – 20 ☐ 21 – 30 ☐ 30 and above ☐
3. **Age Range:** 21 – 30 ☐ 31 – 40 ☐ 41 – 50 ☐ 51 – 60 ☐ 61 – 70 ☐
4. **Cadre/ Designation:** Researcher ☐, Lecturer ☐, Instructor ☐,  
Technologist ☐, Other ☐
5. **Current Level of Education:** HND/BSc ☐ MSc ☐ PhD ☐  
if others, specify: \_\_\_\_\_

## RESEARCH QUESTIONNAIRE

1. Do you think research is important in the leather field? Yes ☐ No ☐
2. Research/Publication should be Mandatory Yes ☐ No ☐
3. Undergoing Postgraduate Training Yes ☐ No ☐
4. Currently involved in Research (Research Involvement) Yes ☐ No ☐
5. Have No Paper Published Yes ☐ No ☐
6. Published at least one paper in a scholarly journal Yes ☐ No ☐
7. Have appeared as 1st Author Yes ☐ No ☐  
(If yes, how many papers?) \_\_\_\_\_
8. Have you benefitted from Research grant(s)? Yes ☐ No ☐
9. Benefitted from Publication fees assistance/waiver? Yes ☐ No ☐
10. To what degree do you personally sponsor your publications?  
Fully ☐ Partially ☐ Not at all ☐
11. What is your source of funds for research/publication?  
Government ☐ Institute ☐ Personal ☐ Others ☐
12. Have you ever presented a paper in a conference within/outside the institute?  
No ☐ Yes ☐ If Yes, specify: within ☐ \_\_\_\_\_ outside ☐ \_\_\_\_\_
13. Which of these obstacles do you think would prevent someone from conducting research?  
Lack of mentor ☐ Lack of training /orientation ☐  
Lack of time ☐ Lack of funding ☐  
Inadequate experience ☐ Inadequate research facilities ☐

14. Motivation for Research?
- |                           |                          |                       |                          |
|---------------------------|--------------------------|-----------------------|--------------------------|
| Self Interest in Research | <input type="checkbox"/> | It is important       | <input type="checkbox"/> |
| Career growth             | <input type="checkbox"/> | Research is Important | <input type="checkbox"/> |
15. Reasons for publishing:
- |                    |                          |                       |                          |
|--------------------|--------------------------|-----------------------|--------------------------|
| Career Progression | <input type="checkbox"/> | Improve Academia      | <input type="checkbox"/> |
| Peer Pressure      | <input type="checkbox"/> | Relay Information     | <input type="checkbox"/> |
| Personal Interest  | <input type="checkbox"/> | Institutional Mandate | <input type="checkbox"/> |
16. Reasons for not publishing:
- |                                 |                          |                                 |                          |
|---------------------------------|--------------------------|---------------------------------|--------------------------|
| Lack of Professional Mentorship | <input type="checkbox"/> | Inadequate Training/Orientation | <input type="checkbox"/> |
| Inadequate Research Experience  | <input type="checkbox"/> | Inadequate Research Facilities  | <input type="checkbox"/> |
| Lack of Funding                 | <input type="checkbox"/> |                                 |                          |
17. Reasons for NOT Publishing by those without at least one published paper:
- |                            |                          |                          |                          |
|----------------------------|--------------------------|--------------------------|--------------------------|
| Waiting Period too long    | <input type="checkbox"/> | High Publication Fees    | <input type="checkbox"/> |
| No writing Experience      | <input type="checkbox"/> | No mentorship            | <input type="checkbox"/> |
| No departmental motivation | <input type="checkbox"/> | Lack of time             | <input type="checkbox"/> |
| Manuscript Rejection       | <input type="checkbox"/> | Not needed for promotion | <input type="checkbox"/> |
18. Suggestions to improve research status:
- |                              |                          |                                  |                          |
|------------------------------|--------------------------|----------------------------------|--------------------------|
| Special Awards of Excellence | <input type="checkbox"/> | Appropriate Mentorship           | <input type="checkbox"/> |
| Research Related Workshops   | <input type="checkbox"/> | Incentives for Research          | <input type="checkbox"/> |
| Publishing Fee Assistance    | <input type="checkbox"/> | Provision of Internet Facilities | <input type="checkbox"/> |
| Annual Publication Target    | <input type="checkbox"/> | Mandatory Publication            | <input type="checkbox"/> |
| Collaborative Research       | <input type="checkbox"/> | Provision of Research Grant      | <input type="checkbox"/> |

RESPONDENT SIGNATURE: ..... DATE: .....

*Thank you very much for your participation. We wish to state once again that any and all identifying information shall be kept confidential. For enquires about the survey and data gathered there from, please feel free to call any member of the Research Team.*
